# Supplementary material
Source: PubMed Central journal article supplement (PMC3059422)
Supplement: mmc1.pdf [file mmc1.pdf]

The American Journal of Human Genetics, Volume 88

**Supplemental Data**

**A Recurrent Deletion of *DPY19L2* Causes Infertility in Man**

**by Blocking Sperm Head Elongation and Acrosome Formation**

Radu Harbuz, Raoudha Zouari, Virginie Pierre, Mariem Ben Khelifa, Mahmoud Kharouf, Charles Coutton, Ghaya Merdassi, Farid Abada, Jessica Escoffier, Yorgos Nikas, François Vialard, Isabelle Koscinski, Chema Triki, Nathalie Sermondade, Thérèse Schweitzer, Amel Zhioua, Fethi Zhioua, Habib Latrous, Lazhar Halouani, Marrakchi Ouafi, Mounir Makni, Pierre-Simon Jouk, Bernard Sèle, Sylviane Hennebicq, Véronique Satre, Stéphane Viville, Christophe Arnoult, Joël Lunardi, and Pierre F Ray

**Figure S1. Position of the 54 Described CNVs in Regard with *DPY19L2* LCR1 and 2**

This illustration shows the physical localization of the 54 CNV centred on *DPY19L2* described in the CNV CHOP database. Only 7 (indicated by an asterisk) of the 108 breakpoints fall outside the range of *DPY19L2* LCR 1 and 2 described in the manuscript.

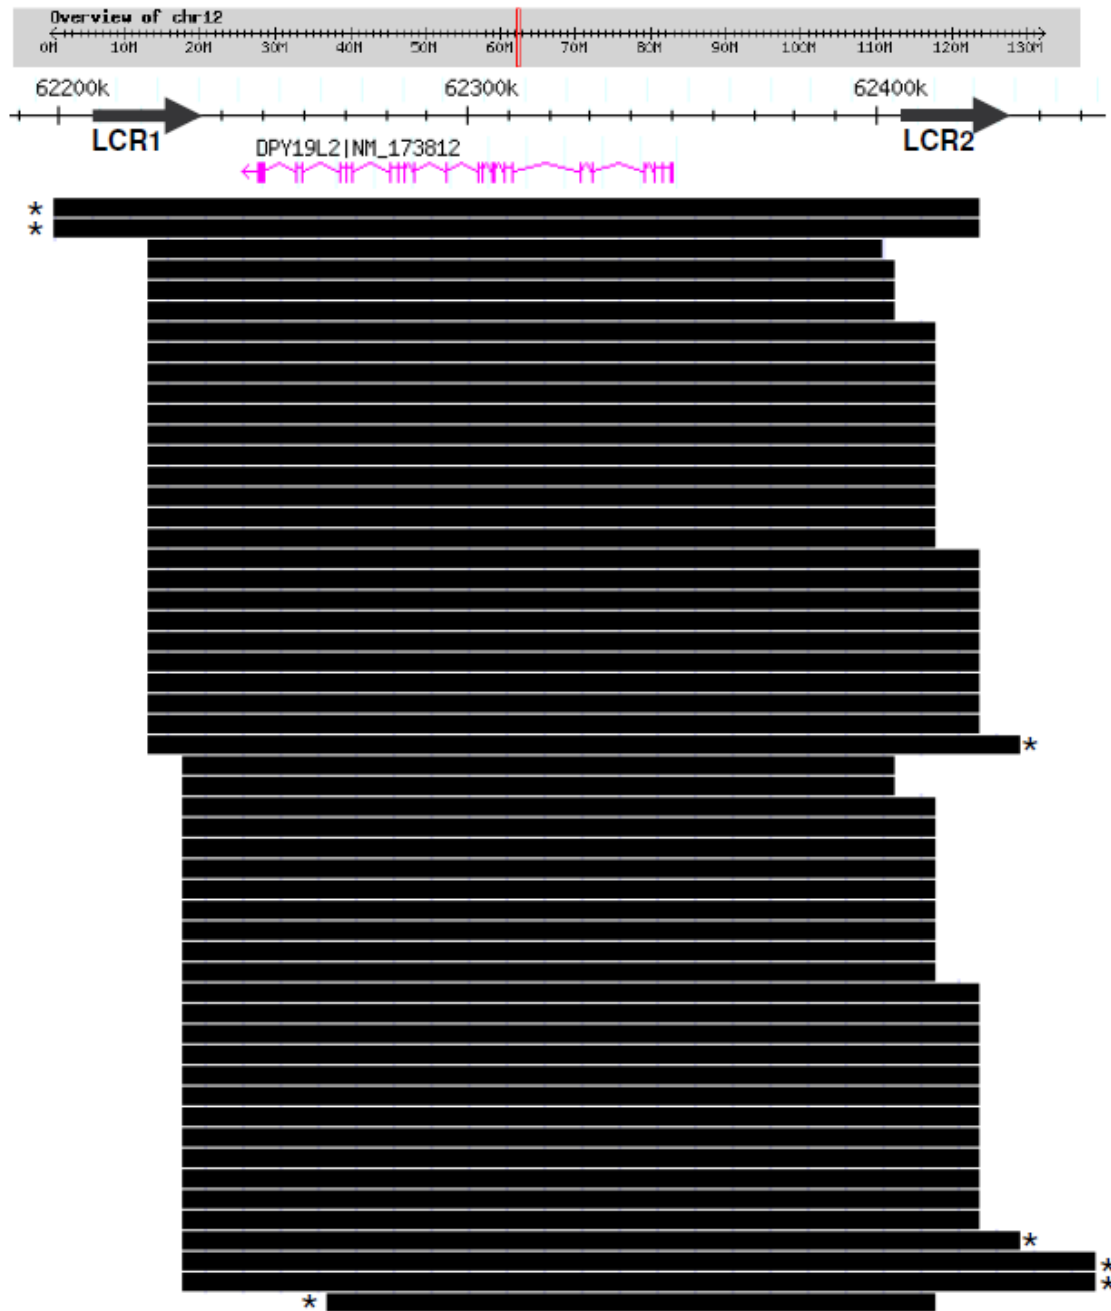

**Table S1. Sequence of the PCR Primers, Size of the Amplified Products, Hybridization Temperature (Hyb.) and Genomic Localization on Chromosome 12 from NCBI36/hg18**

| <b>Locus amplified</b>                  | <b>5' to 3' DNA sequence of the forward (F) and reverse primers (R)</b> | <b>Size (nt)</b> | <b>Hyb. (°C)</b> | <b>Localization</b>       |
|-----------------------------------------|-------------------------------------------------------------------------|------------------|------------------|---------------------------|
| <b>a)</b> centromeric to <i>DPY19L2</i> | F: CCCTCAAGCAATTCTCTTTG<br>R: GATTTGATTTGGGGCCTAA                       | 288              | 60               | 62,216,631-<br>62,216,919 |
| <b>b)</b> centromeric to <i>DPY19L2</i> | F: GATTAAAGTTCTGGGGTGAG<br>R: GCAGCCTATTACTTCCGATA                      | 444              | 60               | 62,233,265-<br>62,233,709 |
| <b>c)</b> exon 22                       | F: GTGTCTGTTATTAAAGCTTGTG<br>R: ATTGTCTCTAGACAGCAATACAT                 | 313              | 57               | 62,240,454-<br>62,240,767 |
| <b>d)</b> exon 11                       | F: AACCTCCTCAAGTGACTTAG<br>R : TTGGCCAAGAGTCATT                         | 516              | 57               | 62,297,046-<br>62,297,562 |
| <b>e)</b> exon 1                        | F: GGCCAAGTTCTTTCTACTCGGAC<br>R: GACCCAGCTCCACCATACTCCTT                | 504              | 65               | 62,347,964-<br>62,348,468 |
| <b>f)</b> telomeric to <i>DPY19L2</i>   | F: CTACTATTGTCTCAACCAAATATGT<br>R : GGAATTCAAGACTAGCCTAGAA              | 610              | 58               | 62,410,682-<br>62,411,292 |
| <b>g)</b> telomeric to <i>DPY19L2</i>   | F : GGCATGGAAGTTACCACAAGAA<br>R : GTTACACCACTGGCCGTCTC                  | 750              | 65               | 62,424,210-<br>62,424,960 |

**Table S2. Results of a Blastn Search for the SNP Sequences Localized in the *DPY19L2* Deleted Region**

The position of the SNP is indicated in bold and the localization on chromosome 12 or 7 of the first nucleotide of each sequence is the indicated in bp (NCBI36/hg18).

| Reference         | Blast result                                                           | Localization  |
|-------------------|------------------------------------------------------------------------|---------------|
| <u>rs7301605</u>  | ATATAAATACACACTTCGAATAGCTAC <b>G</b> ATTGCCTCAGAATTTGTAAAATGT          | 12:62,304,630 |
|                   | <br>ATATAAATACACACTTCGAATAGCTAC <b>G</b> ATTGCCTCAGAATTTGTAAAATGT      | 7:102,668,788 |
| <u>rs4763094</u>  | CCAAACAGGATCATATTAGAGCAATT <b>A</b> CTCTGCATCTACTCTGGTATTGGAT          | 12:62,261,438 |
|                   | <br>CCAAACAGAACCATATTAGAGCAATT <b>A</b> CTCTGCATCTACTCTGGTATTGGAT      | 7:102,623,852 |
| <u>rs11175119</u> | GGGCATGTTGGTAGGCACCTATAAA <b>C</b> CAGCTACTCAGGAAGCTGAGGCAGG           | 12:62,370,370 |
|                   | <br>AGGCATGGTGGTGGGCACCTATAAA <b>C</b> CAGCTACTCAGGAAGCTAAGGCAGG       | 7:35,212,543  |
| <u>rs11175120</u> | TCTTAAAAAAT- - - -A-A-AAATAAAGTGT <b>A</b> TAGTTTGATCAGTTTGGGCATATGTA  | 12:62,370,508 |
|                   | <br>TCTTAAAAAATAAAAATAGAAATAAAGTGT <b>A</b> TAGTTTGATCAGTTTGGGCATATGTA | 7:35,212,680  |
| <u>rs11175121</u> | ATTGCCACAAGCACAATAACAAAA <b>A</b> TACCTAACACCTACAAAAGCTAGCTTC          | 12:62,370,575 |
|                   | <br>ACTGCCACAAGCACAATAACAAAA <b>A</b> TCTAACACCTACAAAAGCTAGCTTC        | 7:35,212,753  |
